# Supplementary material
Source: publisher site journal article supplement (https://www.spandidos-publications.com/1108/downloadSupplementary)
Supplement: Supplementary file 1 [file downloadSupplementary]

## Sheet: Up_GO_enrichment_P
Table SV. Gene Ontology enrichment and KEGG pathways of differentially expressed genes.
#fg	180
#bg	14960
##Statistical test method: hypergeometric test
##FDR correction method: Benjamini and Hochberg
#Term	Database	ID	Input number	Background number	P-Value	Corrected P-Value	Input	Hyperlink
membrane depolarization involved in regulation of action potential	Gene Ontology	GO:0086010	5	31	3.14451e-05	0.000887718	KCNH2|SCN8A|CACNA1F|SCN3B|CACNA1G	http://amigo.geneontology.org/cgi-bin/amigo/term_details?term=GO:0086010
transmembrane transport	Gene Ontology	GO:0055085	19	578	7.00334e-05	0.000887718	AQP7|SGK3|SLC38A4|ADCY5|SLC2A5|ATP8A1|ABCA4|MAL|SLC4A5|ABCB11|SLC25A36|SLC16A12|SLC15A2|BEST1|GABRB3|ATP7A|RYR3|ABCA8|SLCO1C1	http://amigo.geneontology.org/cgi-bin/amigo/term_details?term=GO:0055085
synaptic transmission	Gene Ontology	GO:0007268	15	389	7.36716e-05	0.000887718	ACTN2|PCDHB9|RAPSN|KCNH2|PCDHB2|ADCY5|NCALD|KCNAB3|CACNA1G|CACNG8|PDE7B|GNG2|ABAT|GABBR1|GABRB3	http://amigo.geneontology.org/cgi-bin/amigo/term_details?term=GO:0007268
regulation of transcription, DNA-dependent	Gene Ontology	GO:0006355	32	1305	7.89082e-05	0.000887718	ZNF251|ACVR2B|PPARGC1A|NFKBIZ|ZNF594|EID2B|GCM1|CCNT2|ZNF891|ZNF879|ZNF382|KLF14|ZNF620|SOX15|APBB2|ZNF431|ZNF284|ZNF248|ZNF224|KLHL31|TRIM22|POU5F1|ZNF587|PRDM10|ZNF529|MBTD1|ZNF484|ZNF429|MAK|ZNF286B|ZNF507|SKOR1	http://amigo.geneontology.org/cgi-bin/amigo/term_details?term=GO:0006355
negative regulation of neuron apoptotic process	Gene Ontology	GO:0043524	8	124	0.000126285	0.00113657	SIX4|NAIP|PPARGC1A|NDNF|POU4F1|CHL1|GABRB3|ATP7A	http://amigo.geneontology.org/cgi-bin/amigo/term_details?term=GO:0043524
axon guidance	Gene Ontology	GO:0007411	13	334	0.000205128	0.00153846	BMP7|LAMA2|MYH14|NRXN3|SCN8A|APBB2|CACNA1G|FLRT3|COL4A4|ATOH1|CHL1|COL2A1|SCN3B	http://amigo.geneontology.org/cgi-bin/amigo/term_details?term=GO:0007411
transcription, DNA-dependent	Gene Ontology	GO:0006351	38	1857	0.000655075	0.00397135	FOXP2|ZNF251|ZNF248|NFKBIZ|ZNF594|EID2B|GCM1|TCEANC|CCNT2|ZNF891|ZNF879|ZNF382|KLF14|ZNF620|ZNF431|ZNF284|TCF7|ZNF224|MYEF2|KLHL31|TSHZ2|HOXB4|SALL4|TRIM22|ZNF587|NFIB|PRDM10|ZNF529|MBTD1|ZNF484|HOXD10|ZNF429|BATF2|ZKSCAN8|MAK|ZNF286B|ZNF507|SKOR1	http://amigo.geneontology.org/cgi-bin/amigo/term_details?term=GO:0006351
inner ear morphogenesis	Gene Ontology	GO:0042472	5	59	0.000706018	0.00397135	SIX4|COL2A1|FGFR2|CHRNA10|ATOH1	http://amigo.geneontology.org/cgi-bin/amigo/term_details?term=GO:0042472
cartilage development	Gene Ontology	GO:0051216	5	68	0.00134763	0.00636415	BMP7|ATP7A|GHRL|COL2A1|MMP13	http://amigo.geneontology.org/cgi-bin/amigo/term_details?term=GO:0051216
extracellular matrix organization	Gene Ontology	GO:0030198	11	312	0.00141425	0.00636415	BMP7|LAMA2|MMP13|COMP|APBB2|ATP7A|COL4A4|NDNF|COL2A1|FGA|ICAM2	http://amigo.geneontology.org/cgi-bin/amigo/term_details?term=GO:0030198
axonogenesis	Gene Ontology	GO:0007409	5	78	0.00247853	0.0101394	ATP8A2|POU4F1|FGFR2|PARD6B|CACNA1F	http://amigo.geneontology.org/cgi-bin/amigo/term_details?term=GO:0007409
signal transduction	Gene Ontology	GO:0007165	22	1045	0.00731276	0.0274228	RASSF9|REM2|CHN2|P2RX1|CHL1|ADRBK2|TNFSF13B|ARHGAP42|FAS|UNC5CL|PDE7B|PRKG2|FGF13|FGA|PDE5A|ACVR2B|PRR5-ARHGAP8|GABRB3|ADCY5|TAS2R4|TAS2R5|PTCH2	http://amigo.geneontology.org/cgi-bin/amigo/term_details?term=GO:0007165
neuron migration	Gene Ontology	GO:0001764	5	104	0.0084148	0.0287883	CHL1|FGF13|NDNF|APBB2|ATOH1	http://amigo.geneontology.org/cgi-bin/amigo/term_details?term=GO:0001764
positive regulation of transcription from RNA polymerase II promoter	Gene Ontology	GO:0045944	17	749	0.00895635	0.0287883	BMP7|TCF4|POU4F1|NFIB|SIX4|LMO2|SOX15|HOXB4|PPARGC1A|SALL4|POU5F1|HOXD10|ATOH1|PPARA|ELL3|CCNT2|FGFR2	http://amigo.geneontology.org/cgi-bin/amigo/term_details?term=GO:0045944
platelet activation	Gene Ontology	GO:0030168	7	204	0.0117987	0.0343438	ACTN2|VAV3|ADAMTS13|GNG2|P2RX1|GP6|FGA	http://amigo.geneontology.org/cgi-bin/amigo/term_details?term=GO:0030168
protein complex assembly	Gene Ontology	GO:0006461	5	114	0.0122111	0.0343438	OCLN|FAS|MDM4|PPARGC1A|PARD6B	http://amigo.geneontology.org/cgi-bin/amigo/term_details?term=GO:0006461
ion transmembrane transport	Gene Ontology	GO:0034220	6	179	0.0212575	0.0562698	SGK3|RYR3|ATP8A1|BEST1|GABRB3|ATP7A	http://amigo.geneontology.org/cgi-bin/amigo/term_details?term=GO:0034220
transport	Gene Ontology	GO:0006810	9	349	0.0255115	0.0637787	ABCA10|ABCB11|CACNA1G|SLC15A2|ABCA4|SLC25A36|P2RX1|GABRB3|ABCA8	http://amigo.geneontology.org/cgi-bin/amigo/term_details?term=GO:0006810
homophilic cell adhesion	Gene Ontology	GO:0007156	5	141	0.0278376	0.0659312	DCHS1|PCDHB2|PCDHB9|CDHR4|PCDHGB2	http://amigo.geneontology.org/cgi-bin/amigo/term_details?term=GO:0007156
visual perception	Gene Ontology	GO:0007601	6	193	0.0293528	0.0660438	RDH5|CACNA1F|ABCA4|HMCN1|COL2A1|BEST1	http://amigo.geneontology.org/cgi-bin/amigo/term_details?term=GO:0007601
negative regulation of transcription from RNA polymerase II promoter	Gene Ontology	GO:0000122	12	565	0.0405668	0.0869289	TCF4|SALL4|NFIB|FNIP1|MDM4|SOX15|HOXB4|POU4F1|ZNF431|PPARA|FGFR2|SKOR1	http://amigo.geneontology.org/cgi-bin/amigo/term_details?term=GO:0000122
regulation of small GTPase mediated signal transduction	Gene Ontology	GO:0051056	5	160	0.0441809	0.09037	ARHGEF6|CHN2|VAV3|ARAP2|GARNL3	http://amigo.geneontology.org/cgi-bin/amigo/term_details?term=GO:0051056
ion transport	Gene Ontology	GO:0006811	5	163	0.0471922	0.0921582	SLC15A2|P2RX1|GABRB3|SLC4A5|SLC38A4	http://amigo.geneontology.org/cgi-bin/amigo/term_details?term=GO:0006811
cell differentiation	Gene Ontology	GO:0030154	9	395	0.0496555	0.0921582	NOTCH2NL|TWSG1|SOX15|ZNF431|EID2B|MAK|TXNDC2|MAL|FLT1	http://amigo.geneontology.org/cgi-bin/amigo/term_details?term=GO:0030154
nervous system development	Gene Ontology	GO:0007399	7	278	0.051199	0.0921582	NAIP|TMOD2|PCDHB2|SCN8A|MBD5|FGF13|SCN3B	http://amigo.geneontology.org/cgi-bin/amigo/term_details?term=GO:0007399
positive regulation of apoptotic process	Gene Ontology	GO:0043065	7	294	0.0651067	0.112685	BMP7|ARHGEF6|FAS|VAV3|APBB2|CLIP3|POU4F1	http://amigo.geneontology.org/cgi-bin/amigo/term_details?term=GO:0043065
cellular nitrogen compound metabolic process	Gene Ontology	GO:0034641	5	185	0.0729234	0.121539	TAT|PRODH|PSME4|CSAD|ACADSB	http://amigo.geneontology.org/cgi-bin/amigo/term_details?term=GO:0034641
immune response	Gene Ontology	GO:0006955	9	476	0.121166	0.194731	TGFBR3|TCF7|FAS|HLA-F|TRIM22|S1PR4|MARCH1|HLA-DMB|TNFSF13B	http://amigo.geneontology.org/cgi-bin/amigo/term_details?term=GO:0006955
small GTPase mediated signal transduction	Gene Ontology	GO:0007264	7	348	0.127372	0.197646	RASGRP3|ARAP2|ARHGEF6|VAV3|CHN2|DNAJC27|REM2	http://amigo.geneontology.org/cgi-bin/amigo/term_details?term=GO:0007264
cell adhesion	Gene Ontology	GO:0007155	8	445	0.16872	0.251325	SSPO|LAMA2|ACTN2|PCDHB2|FLRT3|COMP|CHL1|MPDZ	http://amigo.geneontology.org/cgi-bin/amigo/term_details?term=GO:0007155
intracellular signal transduction	Gene Ontology	GO:0035556	7	379	0.173135	0.251325	TGFBR3|ADCY5|ASB16|VAV3|APBB2|CHN2|FLRT3	http://amigo.geneontology.org/cgi-bin/amigo/term_details?term=GO:0035556
blood coagulation	Gene Ontology	GO:0007596	8	469	0.204624	0.282516	ACTN2|VAV3|GNG2|PRKG2|P2RX1|GP6|FGA|PDE5A	http://amigo.geneontology.org/cgi-bin/amigo/term_details?term=GO:0007596
multicellular organismal development	Gene Ontology	GO:0007275	8	474	0.212469	0.282516	NOTCH2NL|TSHZ2|PSME4|TBC1D32|DND1|MAK|TXNDC2|LMO2	http://amigo.geneontology.org/cgi-bin/amigo/term_details?term=GO:0007275
negative regulation of apoptotic process	Gene Ontology	GO:0043066	8	475	0.214053	0.282516	GHRL|COMP|PSME4|NAIP|APBB2|ATOH1|FAS|MDM4	http://amigo.geneontology.org/cgi-bin/amigo/term_details?term=GO:0043066
transcription from RNA polymerase II promoter	Gene Ontology	GO:0006366	7	407	0.219735	0.282516	NFIB|POU4F1|POU5F1|ATOH1|ELL3|CCNT2|PLAG1	http://amigo.geneontology.org/cgi-bin/amigo/term_details?term=GO:0006366
nerve growth factor receptor signaling pathway	Gene Ontology	GO:0048011	5	273	0.232613	0.289937	ARHGEF6|ADCY5|VAV3|FGFR2|FRS2	http://amigo.geneontology.org/cgi-bin/amigo/term_details?term=GO:0048011
spermatogenesis	Gene Ontology	GO:0007283	6	346	0.238393	0.289937	AQP7|AK7|ELL3|MAK|TXNDC2|CCT6B	http://amigo.geneontology.org/cgi-bin/amigo/term_details?term=GO:0007283
carbohydrate metabolic process	Gene Ontology	GO:0005975	6	354	0.254349	0.301202	B3GNT7|AMY2B|ST8SIA5|GK5|GALNT4|SLC2A5	http://amigo.geneontology.org/cgi-bin/amigo/term_details?term=GO:0005975
apoptotic process	Gene Ontology	GO:0006915	9	605	0.305314	0.352286	ARHGEF6|FAS|PSME4|SHF|COMP|OCLN|FGFR2|MAL|TNFRSF19	http://amigo.geneontology.org/cgi-bin/amigo/term_details?term=GO:0006915
cell proliferation	Gene Ontology	GO:0008283	5	344	0.39875	0.448594	DACH1|GNG2|MDM4|HOXB4|TNFSF13B	http://amigo.geneontology.org/cgi-bin/amigo/term_details?term=GO:0008283
innate immune response	Gene Ontology	GO:0045087	9	754	0.558287	0.612754	ADCY5|CD1D|PELI2|VAV3|NAIP|FRS2|CYBB|FGFR2|APOBEC3G	http://amigo.geneontology.org/cgi-bin/amigo/term_details?term=GO:0045087
small molecule metabolic process	Gene Ontology	GO:0044281	16	1413	0.638854	0.677147	TAT|ADCY5|CA5A|B3GNT7|SULT1B1|SLC2A5|PPM1L|CSAD|PRODH|ABCB11|PLCH1|GNG2|ACADSB|PRKG2|PSME4|PPARA	http://amigo.geneontology.org/cgi-bin/amigo/term_details?term=GO:0044281
negative regulation of transcription, DNA-dependent	Gene Ontology	GO:0045892	5	464	0.660502	0.677147	BMP7|FOXP2|ZNF224|BTAF1|ZNF382	http://amigo.geneontology.org/cgi-bin/amigo/term_details?term=GO:0045892
viral reproduction	Gene Ontology	GO:0016032	6	555	0.662099	0.677147	CD1D|PSME4|TRIM22|MPDZ|CCNT2|APOBEC3G	http://amigo.geneontology.org/cgi-bin/amigo/term_details?term=GO:0016032
cellular protein metabolic process	Gene Ontology	GO:0044267	5	530	0.768935	0.768935	GALNT4|GHRL|B3GNT7|CCT6B|MMP13	http://amigo.geneontology.org/cgi-bin/amigo/term_details?term=GO:0044267

## Sheet: Down_GO_enrichment_P
#fg	65
#bg	14960
##Statistical test method: hypergeometric test
##FDR correction method: Benjamini and Hochberg
#Term	Database	ID	Input number	Background number	P-Value	Corrected P-Value	Input	Hyperlink
signal transduction	Gene Ontology	GO:0007165	14	1045	0.000127509	0.00165762	CSF2RB|RASD1|CSH1|CDS1|CD34|CHRM1|CXCL11|CHRNA7|DLL4|ARHGAP9|FGF7|CD300C|FLNB|PSTPIP1	http://amigo.geneontology.org/cgi-bin/amigo/term_details?term=GO:0007165
cell adhesion	Gene Ontology	GO:0007155	8	445	0.000657372	0.00427292	CD34|CNTN1|SIGLEC9|NPHS1|CLCA2|GP5|PSTPIP1|ITGAM	http://amigo.geneontology.org/cgi-bin/amigo/term_details?term=GO:0007155
angiogenesis	Gene Ontology	GO:0001525	5	206	0.00199374	0.00691188	NRCAM|ANGPTL4|DLL4|ECSCR|RORA	http://amigo.geneontology.org/cgi-bin/amigo/term_details?term=GO:0001525
inflammatory response	Gene Ontology	GO:0006954	6	307	0.00212673	0.00691188	CXCL3|IL23A|CCR7|CXCL11|PSTPIP1|IRGM	http://amigo.geneontology.org/cgi-bin/amigo/term_details?term=GO:0006954
innate immune response	Gene Ontology	GO:0045087	9	754	0.00508324	0.0132164	NCF2|TRIM15|IL23A|ELMO1|ITGAM|FGF7|PSTPIP1|IRGM|IGHE	http://amigo.geneontology.org/cgi-bin/amigo/term_details?term=GO:0045087
cell differentiation	Gene Ontology	GO:0030154	6	395	0.00725835	0.0157264	TLL2|ECSCR|ANGPTL4|TCP11|FLNB|NDRG4	http://amigo.geneontology.org/cgi-bin/amigo/term_details?term=GO:0030154
extracellular matrix organization	Gene Ontology	GO:0030198	5	312	0.0113805	0.0211353	COL5A3|TLL2|C6orf15|ITGAM|MMP9	http://amigo.geneontology.org/cgi-bin/amigo/term_details?term=GO:0030198
small molecule metabolic process	Gene Ontology	GO:0044281	12	1413	0.017479	0.0284034	GSTO2|NAGS|ACOX2|CDS1|CA14|XDH|TPO|ANGPTL4|DIO3|KCNS3|UGT1A6|PLA2G4F	http://amigo.geneontology.org/cgi-bin/amigo/term_details?term=GO:0044281
transmembrane transport	Gene Ontology	GO:0055085	6	578	0.0391402	0.0565359	SLC2A8|SPNS2|MFSD7|SLC6A18|MCOLN2|ATP6V1B1	http://amigo.geneontology.org/cgi-bin/amigo/term_details?term=GO:0055085
multicellular organismal development	Gene Ontology	GO:0007275	5	474	0.0547928	0.0652315	PAX5|TMEM198|TLL2|TCP11|EHF	http://amigo.geneontology.org/cgi-bin/amigo/term_details?term=GO:0007275
negative regulation of apoptotic process	Gene Ontology	GO:0043066	5	475	0.0551959	0.0652315	TP63|AGAP2|NCKAP1L|ANGPTL4|WNT11	http://amigo.geneontology.org/cgi-bin/amigo/term_details?term=GO:0043066
positive regulation of transcription from RNA polymerase II promoter	Gene Ontology	GO:0045944	6	749	0.105924	0.114751	TP63|IL23A|TFAP2E|RORA|PAX5|AGAP2	http://amigo.geneontology.org/cgi-bin/amigo/term_details?term=GO:0045944
transcription, DNA-dependent	Gene Ontology	GO:0006351	7	1857	0.711983	0.711983	TP63|ZNF737|TFAP2E|RORA|PAX5|HOXA6|ZNF582	http://amigo.geneontology.org/cgi-bin/amigo/term_details?term=GO:0006351

## Sheet: Up_KEGG_pathway_iden
#fg	96
#bg	6644
##Statistical test method: hypergeometric test
##FDR correction method: Benjamini and Hochberg
#Term	Database	ID	Input number	Background number	P-Value	Corrected P-Value	Input	Hyperlink
GABAergic synapse	KEGG PATHWAY	hsa04727	6	90	0.00182381	0.132285	ADCY5|CACNA1F|GNG2|ABAT|GABBR1|GABRB3	http://www.genome.jp/kegg-bin/show_pathway?hsa04727/hsa:18%09red/hsa:2562%09red/hsa:778%09red/hsa:54331%09red/hsa:111%09red/hsa:2550%09red
Morphine addiction	KEGG PATHWAY	hsa05032	6	93	0.00215682	0.132285	ADCY5|PDE7B|GNG2|GABBR1|GABRB3|ADRBK2	http://www.genome.jp/kegg-bin/show_pathway?hsa05032/hsa:2562%09red/hsa:157%09red/hsa:54331%09red/hsa:111%09red/hsa:27115%09red/hsa:2550%09red
ABC transporters	KEGG PATHWAY	hsa02010	4	44	0.00357074	0.132285	ABCA10|ABCA4|ABCB11|ABCA8	http://www.genome.jp/kegg-bin/show_pathway?hsa02010/hsa:10349%09red/hsa:10351%09red/hsa:24%09red/hsa:8647%09red
Retrograde endocannabinoid signaling	KEGG PATHWAY	hsa04723	6	103	0.00360515	0.132285	ADCY5|FAAH|NAPEPLD|CACNA1F|GNG2|GABRB3	http://www.genome.jp/kegg-bin/show_pathway?hsa04723/hsa:2562%09red/hsa:778%09red/hsa:54331%09red/hsa:111%09red/hsa:222236%09red/hsa:2166%09red
Arrhythmogenic right ventricular cardiomyopathy (ARVC)	KEGG PATHWAY	hsa05412	5	75	0.00440951	0.132285	CACNG8|ACTN2|LAMA2|TCF7|CACNA1F	http://www.genome.jp/kegg-bin/show_pathway?hsa05412/hsa:59283%09red/hsa:6932%09red/hsa:778%09red/hsa:88%09red/hsa:3908%09red
ECM-receptor interaction	KEGG PATHWAY	hsa04512	5	87	0.00824506	0.206127	COMP|LAMA2|COL4A4|COL2A1|GP6	http://www.genome.jp/kegg-bin/show_pathway?hsa04512/hsa:1311%09red/hsa:1286%09red/hsa:51206%09red/hsa:3908%09red/hsa:1280%09red
Circadian entrainment	KEGG PATHWAY	hsa04713	5	97	0.0128513	0.275386	ADCY5|RYR3|PRKG2|GNG2|CACNA1G	http://www.genome.jp/kegg-bin/show_pathway?hsa04713/hsa:111%09red/hsa:8913%09red/hsa:5593%09red/hsa:54331%09red/hsa:6263%09red
Allograft rejection	KEGG PATHWAY	hsa05330	3	38	0.0171139	0.304741	FAS|HLA-DMB|HLA-F	http://www.genome.jp/kegg-bin/show_pathway?hsa05330/hsa:3134%09red/hsa:355%09red/hsa:3109%09red
Viral myocarditis	KEGG PATHWAY	hsa05416	4	71	0.0190312	0.304741	MYH14|LAMA2|HLA-DMB|HLA-F	http://www.genome.jp/kegg-bin/show_pathway?hsa05416/hsa:3134%09red/hsa:79784%09red/hsa:3908%09red/hsa:3109%09red
Amoebiasis	KEGG PATHWAY	hsa05146	5	109	0.0203659	0.304741	ACTN2|CD1D|COL4A4|COL2A1|LAMA2	http://www.genome.jp/kegg-bin/show_pathway?hsa05146/hsa:912%09red/hsa:1280%09red/hsa:88%09red/hsa:3908%09red/hsa:1286%09red
Graft-versus-host disease	KEGG PATHWAY	hsa05332	3	42	0.0223477	0.304741	FAS|HLA-DMB|HLA-F	http://www.genome.jp/kegg-bin/show_pathway?hsa05332/hsa:3134%09red/hsa:355%09red/hsa:3109%09red
Type I diabetes mellitus	KEGG PATHWAY	hsa04940	3	44	0.0252561	0.31195	FAS|HLA-DMB|HLA-F	http://www.genome.jp/kegg-bin/show_pathway?hsa04940/hsa:3134%09red/hsa:355%09red/hsa:3109%09red
Endocytosis	KEGG PATHWAY	hsa04144	7	203	0.0270357	0.31195	ARAP2|HLA-F|PARD6B|PSD3|FGFR2|ADRBK2|FLT1	http://www.genome.jp/kegg-bin/show_pathway?hsa04144/hsa:116984%09red/hsa:157%09red/hsa:2263%09red/hsa:2321%09red/hsa:23362%09red/hsa:84612%09red/hsa:3134%09red
Focal adhesion	KEGG PATHWAY	hsa04510	7	207	0.029655	0.317732	ACTN2|LAMA2|COMP|VAV3|COL4A4|COL2A1|FLT1	http://www.genome.jp/kegg-bin/show_pathway?hsa04510/hsa:1286%09red/hsa:1280%09red/hsa:1311%09red/hsa:88%09red/hsa:2321%09red/hsa:10451%09red/hsa:3908%09red
Autoimmune thyroid disease	KEGG PATHWAY	hsa05320	3	53	0.0407342	0.388723	FAS|HLA-DMB|HLA-F	http://www.genome.jp/kegg-bin/show_pathway?hsa05320/hsa:3134%09red/hsa:355%09red/hsa:3109%09red
Dilated cardiomyopathy	KEGG PATHWAY	hsa05414	4	91	0.0421747	0.388723	CACNG8|ADCY5|LAMA2|CACNA1F	http://www.genome.jp/kegg-bin/show_pathway?hsa05414/hsa:59283%09red/hsa:111%09red/hsa:778%09red/hsa:3908%09red
Tight junction	KEGG PATHWAY	hsa04530	5	134	0.0440553	0.388723	OCLN|ACTN2|MYH14|PARD6B|MPDZ	http://www.genome.jp/kegg-bin/show_pathway?hsa04530/hsa:79784%09red/hsa:84612%09red/hsa:88%09red/hsa:100506658%09red/hsa:8777%09red
Cell adhesion molecules (CAMs)	KEGG PATHWAY	hsa04514	5	143	0.0554582	0.462152	OCLN|NRXN3|HLA-DMB|HLA-F|ICAM2	http://www.genome.jp/kegg-bin/show_pathway?hsa04514/hsa:3384%09red/hsa:3134%09red/hsa:9369%09red/hsa:100506658%09red/hsa:3109%09red
PI3K-Akt signaling pathway	KEGG PATHWAY	hsa04151	9	346	0.0614485	0.469432	LAMA2|SGK3|COMP|COL4A4|GNG2|COL2A1|FGF13|FGFR2|FLT1	http://www.genome.jp/kegg-bin/show_pathway?hsa04151/hsa:1286%09red/hsa:2258%09red/hsa:1280%09red/hsa:1311%09red/hsa:23678%09red/hsa:2321%09red/hsa:54331%09red/hsa:2263%09red/hsa:3908%09red
Phenylalanine, tyrosine and tryptophan biosynthesis	KEGG PATHWAY	hsa00400	1	5	0.0702083	0.469432	TAT	http://www.genome.jp/kegg-bin/show_pathway?hsa00400/hsa:6898%09red
Mucin type O-Glycan biosynthesis	KEGG PATHWAY	hsa00512	2	31	0.0733018	0.469432	GALNT4|GALNT16	http://www.genome.jp/kegg-bin/show_pathway?hsa00512/hsa:8693%09red/hsa:57452%09red
p53 signaling pathway	KEGG PATHWAY	hsa04115	3	68	0.0748173	0.469432	FAS|MDM4|SESN3	http://www.genome.jp/kegg-bin/show_pathway?hsa04115/hsa:4194%09red/hsa:143686%09red/hsa:355%09red
MAPK signaling pathway	KEGG PATHWAY	hsa04010	7	260	0.0813172	0.469432	RASGRP3|FAS|CACNA1F|CACNA1G|CACNG8|FGF13|FGFR2	http://www.genome.jp/kegg-bin/show_pathway?hsa04010/hsa:2258%09red/hsa:59283%09red/hsa:778%09red/hsa:355%09red/hsa:25780%09red/hsa:2263%09red/hsa:8913%09red
Serotonergic synapse	KEGG PATHWAY	hsa04726	4	114	0.0823421	0.469432	ADCY5|GABRB3|GNG2|CACNA1F	http://www.genome.jp/kegg-bin/show_pathway?hsa04726/hsa:111%09red/hsa:778%09red/hsa:2562%09red/hsa:54331%09red
PPAR signaling pathway	KEGG PATHWAY	hsa03320	3	71	0.0827792	0.469432	AQP7|ACSBG1|PPARA	http://www.genome.jp/kegg-bin/show_pathway?hsa03320/hsa:364%09red/hsa:23205%09red/hsa:5465%09red
Adipocytokine signaling pathway	KEGG PATHWAY	hsa04920	3	71	0.0827792	0.469432	PPARA|PPARGC1A|ACSBG1	http://www.genome.jp/kegg-bin/show_pathway?hsa04920/hsa:23205%09red/hsa:10891%09red/hsa:5465%09red
Bile secretion	KEGG PATHWAY	hsa04976	3	72	0.0855117	0.469432	SLC4A5|ADCY5|ABCB11	http://www.genome.jp/kegg-bin/show_pathway?hsa04976/hsa:111%09red/hsa:57835%09red/hsa:8647%09red
Regulation of actin cytoskeleton	KEGG PATHWAY	hsa04810	6	215	0.0901687	0.469432	ACTN2|MYH14|ARHGEF6|VAV3|FGF13|FGFR2	http://www.genome.jp/kegg-bin/show_pathway?hsa04810/hsa:9459%09red/hsa:2258%09red/hsa:88%09red/hsa:79784%09red/hsa:2263%09red/hsa:10451%09red
Leukocyte transendothelial migration	KEGG PATHWAY	hsa04670	4	118	0.0907568	0.469432	OCLN|ACTN2|VAV3|CYBB	http://www.genome.jp/kegg-bin/show_pathway?hsa04670/hsa:88%09red/hsa:10451%09red/hsa:100506658%09red/hsa:1536%09red
Transcriptional misregulation in cancer	KEGG PATHWAY	hsa05202	5	179	0.116458	0.555283	NFKBIZ|SIX4|LMO2|CCNT2|FLT1	http://www.genome.jp/kegg-bin/show_pathway?hsa05202/hsa:64332%09red/hsa:4005%09red/hsa:2321%09red/hsa:51804%09red/hsa:905%09red
Hypertrophic cardiomyopathy (HCM)	KEGG PATHWAY	hsa05410	3	84	0.121121	0.555283	CACNG8|LAMA2|CACNA1F	http://www.genome.jp/kegg-bin/show_pathway?hsa05410/hsa:59283%09red/hsa:778%09red/hsa:3908%09red
Fatty acid degradation	KEGG PATHWAY	hsa00071	2	44	0.13248	0.555283	ACSBG1|ACADSB	http://www.genome.jp/kegg-bin/show_pathway?hsa00071/hsa:23205%09red/hsa:36%09red
Valine, leucine and isoleucine degradation	KEGG PATHWAY	hsa00280	2	44	0.13248	0.555283	ACADSB|ABAT	http://www.genome.jp/kegg-bin/show_pathway?hsa00280/hsa:18%09red/hsa:36%09red
Taurine and hypotaurine metabolism	KEGG PATHWAY	hsa00430	1	10	0.135535	0.555283	CSAD	http://www.genome.jp/kegg-bin/show_pathway?hsa00430/hsa:51380%09red
Ubiquinone and other terpenoid-quinone biosynthesis	KEGG PATHWAY	hsa00130	1	10	0.135535	0.555283	TAT	http://www.genome.jp/kegg-bin/show_pathway?hsa00130/hsa:6898%09red
Carbohydrate digestion and absorption	KEGG PATHWAY	hsa04973	2	45	0.137396	0.555283	SLC2A5|AMY2B	http://www.genome.jp/kegg-bin/show_pathway?hsa04973/hsa:6518%09red/hsa:280%09red
Salivary secretion	KEGG PATHWAY	hsa04970	3	90	0.140672	0.555283	ADCY5|RYR3|PRKG2	http://www.genome.jp/kegg-bin/show_pathway?hsa04970/hsa:111%09red/hsa:6263%09red/hsa:5593%09red
Rheumatoid arthritis	KEGG PATHWAY	hsa05323	3	90	0.140672	0.555283	TNFSF13B|HLA-DMB|FLT1	http://www.genome.jp/kegg-bin/show_pathway?hsa05323/hsa:2321%09red/hsa:10673%09red/hsa:3109%09red
Intestinal immune network for IgA production	KEGG PATHWAY	hsa04672	2	48	0.152377	0.586065	HLA-DMB|TNFSF13B	http://www.genome.jp/kegg-bin/show_pathway?hsa04672/hsa:10673%09red/hsa:3109%09red
Riboflavin metabolism	KEGG PATHWAY	hsa00740	1	13	0.172529	0.626543	ACPP	http://www.genome.jp/kegg-bin/show_pathway?hsa00740/hsa:55%09red
Taste transduction	KEGG PATHWAY	hsa04742	2	53	0.177995	0.626543	TAS2R4|TAS2R5	http://www.genome.jp/kegg-bin/show_pathway?hsa04742/hsa:54429%09red/hsa:50832%09red
Phagosome	KEGG PATHWAY	hsa04145	4	154	0.182629	0.626543	CYBB|COMP|HLA-DMB|HLA-F	http://www.genome.jp/kegg-bin/show_pathway?hsa04145/hsa:1311%09red/hsa:3134%09red/hsa:1536%09red/hsa:3109%09red
Cytokine-cytokine receptor interaction	KEGG PATHWAY	hsa04060	6	266	0.185998	0.626543	BMP7|ACVR2B|FAS|FLT1|TNFSF13B|TNFRSF19	http://www.genome.jp/kegg-bin/show_pathway?hsa04060/hsa:655%09red/hsa:55504%09red/hsa:2321%09red/hsa:93%09red/hsa:355%09red/hsa:10673%09red
Basal cell carcinoma	KEGG PATHWAY	hsa05217	2	55	0.188426	0.626543	PTCH2|TCF7	http://www.genome.jp/kegg-bin/show_pathway?hsa05217/hsa:6932%09red/hsa:8643%09red
Pathways in cancer	KEGG PATHWAY	hsa05200	7	327	0.192963	0.626543	LAMA2|FAS|TCF7|FGF13|COL4A4|PTCH2|FGFR2	http://www.genome.jp/kegg-bin/show_pathway?hsa05200/hsa:1286%09red/hsa:8643%09red/hsa:2258%09red/hsa:355%09red/hsa:2263%09red/hsa:6932%09red/hsa:3908%09red
Glycosaminoglycan biosynthesis - keratan sulfate	KEGG PATHWAY	hsa00533	1	15	0.196317	0.626543	B3GNT7	http://www.genome.jp/kegg-bin/show_pathway?hsa00533/hsa:93010%09red
Glycosphingolipid biosynthesis - ganglio series	KEGG PATHWAY	hsa00604	1	15	0.196317	0.626543	ST8SIA5	http://www.genome.jp/kegg-bin/show_pathway?hsa00604/hsa:29906%09red
Neuroactive ligand-receptor interaction	KEGG PATHWAY	hsa04080	6	275	0.206092	0.644037	GABRB3|CHRNA10|S1PR4|P2RX1|GABBR1|GPR83	http://www.genome.jp/kegg-bin/show_pathway?hsa04080/hsa:57053%09red/hsa:2562%09red/hsa:5023%09red/hsa:2550%09red/hsa:10888%09red/hsa:8698%09red
Cholinergic synapse	KEGG PATHWAY	hsa04725	3	113	0.223567	0.678632	ADCY5|GNG2|CACNA1F	http://www.genome.jp/kegg-bin/show_pathway?hsa04725/hsa:111%09red/hsa:778%09red/hsa:54331%09red
Purine metabolism	KEGG PATHWAY	hsa00230	4	169	0.227627	0.678632	ADCY5|PDE7B|AK7|PDE5A	http://www.genome.jp/kegg-bin/show_pathway?hsa00230/hsa:111%09red/hsa:27115%09red/hsa:122481%09red/hsa:8654%09red
Phenylalanine metabolism	KEGG PATHWAY	hsa00360	1	18	0.230735	0.678632	TAT	http://www.genome.jp/kegg-bin/show_pathway?hsa00360/hsa:6898%09red
Glutamatergic synapse	KEGG PATHWAY	hsa04724	3	118	0.242774	0.700309	ADCY5|GNG2|ADRBK2	http://www.genome.jp/kegg-bin/show_pathway?hsa04724/hsa:157%09red/hsa:111%09red/hsa:54331%09red
One carbon pool by folate	KEGG PATHWAY	hsa00670	1	20	0.252866	0.715659	ALDH1L2	http://www.genome.jp/kegg-bin/show_pathway?hsa00670/hsa:160428%09red
Retinol metabolism	KEGG PATHWAY	hsa00830	2	68	0.257701	0.715836	RDH5|DHRS9	http://www.genome.jp/kegg-bin/show_pathway?hsa00830/hsa:5959%09red/hsa:10170%09red
Calcium signaling pathway	KEGG PATHWAY	hsa04020	4	183	0.271908	0.726277	P2RX1|RYR3|CACNA1F|CACNA1G	http://www.genome.jp/kegg-bin/show_pathway?hsa04020/hsa:5023%09red/hsa:8913%09red/hsa:778%09red/hsa:6263%09red
Thyroid hormone synthesis	KEGG PATHWAY	hsa04918	2	72	0.279227	0.726277	ASGR1|ADCY5	http://www.genome.jp/kegg-bin/show_pathway?hsa04918/hsa:432%09red/hsa:111%09red
Adherens junction	KEGG PATHWAY	hsa04520	2	73	0.284606	0.726277	ACTN2|TCF7	http://www.genome.jp/kegg-bin/show_pathway?hsa04520/hsa:6932%09red/hsa:88%09red
B cell receptor signaling pathway	KEGG PATHWAY	hsa04662	2	74	0.289982	0.726277	RASGRP3|VAV3	http://www.genome.jp/kegg-bin/show_pathway?hsa04662/hsa:10451%09red/hsa:25780%09red
Chemokine signaling pathway	KEGG PATHWAY	hsa04062	4	189	0.291355	0.726277	ADCY5|VAV3|GNG2|ADRBK2	http://www.genome.jp/kegg-bin/show_pathway?hsa04062/hsa:157%09red/hsa:111%09red/hsa:10451%09red/hsa:54331%09red
Glycosaminoglycan biosynthesis - heparan sulfate / heparin	KEGG PATHWAY	hsa00534	1	24	0.295255	0.726277	HS6ST3	http://www.genome.jp/kegg-bin/show_pathway?hsa00534/hsa:266722%09red
Gastric acid secretion	KEGG PATHWAY	hsa04971	2	75	0.295353	0.726277	KCNE2|ADCY5	http://www.genome.jp/kegg-bin/show_pathway?hsa04971/hsa:111%09red/hsa:9992%09red
Cardiac muscle contraction	KEGG PATHWAY	hsa04260	2	77	0.306078	0.726665	CACNG8|CACNA1F	http://www.genome.jp/kegg-bin/show_pathway?hsa04260/hsa:59283%09red/hsa:778%09red
Antigen processing and presentation	KEGG PATHWAY	hsa04612	2	78	0.31143	0.726665	HLA-DMB|HLA-F	http://www.genome.jp/kegg-bin/show_pathway?hsa04612/hsa:3134%09red/hsa:3109%09red
Natural killer cell mediated cytotoxicity	KEGG PATHWAY	hsa04650	3	137	0.317629	0.726665	FAS|VAV3|ICAM2	http://www.genome.jp/kegg-bin/show_pathway?hsa04650/hsa:3384%09red/hsa:10451%09red/hsa:355%09red
TGF-beta signaling pathway	KEGG PATHWAY	hsa04350	2	80	0.32211	0.726665	BMP7|ACVR2B	http://www.genome.jp/kegg-bin/show_pathway?hsa04350/hsa:93%09red/hsa:655%09red
Nitrogen metabolism	KEGG PATHWAY	hsa00910	1	27	0.325477	0.726665	CA5A	http://www.genome.jp/kegg-bin/show_pathway?hsa00910/hsa:763%09red
Butanoate metabolism	KEGG PATHWAY	hsa00650	1	29	0.344908	0.726665	ABAT	http://www.genome.jp/kegg-bin/show_pathway?hsa00650/hsa:18%09red
Thyroid cancer	KEGG PATHWAY	hsa05216	1	29	0.344908	0.726665	TCF7	http://www.genome.jp/kegg-bin/show_pathway?hsa05216/hsa:6932%09red
beta-Alanine metabolism	KEGG PATHWAY	hsa00410	1	29	0.344908	0.726665	ABAT	http://www.genome.jp/kegg-bin/show_pathway?hsa00410/hsa:18%09red
Small cell lung cancer	KEGG PATHWAY	hsa05222	2	86	0.353886	0.726665	LAMA2|COL4A4	http://www.genome.jp/kegg-bin/show_pathway?hsa05222/hsa:1286%09red/hsa:3908%09red
Insulin secretion	KEGG PATHWAY	hsa04911	2	87	0.359136	0.726665	ADCY5|CACNA1F	http://www.genome.jp/kegg-bin/show_pathway?hsa04911/hsa:111%09red/hsa:778%09red
Asthma	KEGG PATHWAY	hsa05310	1	31	0.363786	0.726665	HLA-DMB	http://www.genome.jp/kegg-bin/show_pathway?hsa05310/hsa:3109%09red
Protein digestion and absorption	KEGG PATHWAY	hsa04974	2	88	0.364371	0.726665	COL4A4|COL2A1	http://www.genome.jp/kegg-bin/show_pathway?hsa04974/hsa:1286%09red/hsa:1280%09red
Prostate cancer	KEGG PATHWAY	hsa05215	2	89	0.36959	0.726665	TCF7|FGFR2	http://www.genome.jp/kegg-bin/show_pathway?hsa05215/hsa:6932%09red/hsa:2263%09red
Gap junction	KEGG PATHWAY	hsa04540	2	89	0.36959	0.726665	ADCY5|PRKG2	http://www.genome.jp/kegg-bin/show_pathway?hsa04540/hsa:111%09red/hsa:5593%09red
Propanoate metabolism	KEGG PATHWAY	hsa00640	1	32	0.373021	0.726665	ABAT	http://www.genome.jp/kegg-bin/show_pathway?hsa00640/hsa:18%09red
Alanine, aspartate and glutamate metabolism	KEGG PATHWAY	hsa00250	1	32	0.373021	0.726665	ABAT	http://www.genome.jp/kegg-bin/show_pathway?hsa00250/hsa:18%09red
GnRH signaling pathway	KEGG PATHWAY	hsa04912	2	92	0.385147	0.727766	ADCY5|CACNA1F	http://www.genome.jp/kegg-bin/show_pathway?hsa04912/hsa:111%09red/hsa:778%09red
Cysteine and methionine metabolism	KEGG PATHWAY	hsa00270	1	34	0.391097	0.727766	TAT	http://www.genome.jp/kegg-bin/show_pathway?hsa00270/hsa:6898%09red
African trypanosomiasis	KEGG PATHWAY	hsa05143	1	34	0.391097	0.727766	FAS	http://www.genome.jp/kegg-bin/show_pathway?hsa05143/hsa:355%09red
Hippo signaling pathway	KEGG PATHWAY	hsa04390	3	156	0.392994	0.727766	BMP7|TCF7|PARD6B	http://www.genome.jp/kegg-bin/show_pathway?hsa04390/hsa:6932%09red/hsa:84612%09red/hsa:655%09red
Pancreatic secretion	KEGG PATHWAY	hsa04972	2	96	0.405632	0.741195	ADCY5|AMY2B	http://www.genome.jp/kegg-bin/show_pathway?hsa04972/hsa:111%09red/hsa:280%09red
Proteoglycans in cancer	KEGG PATHWAY	hsa05205	4	225	0.410128	0.741195	FGF13|FAS|HOXD10|FRS2	http://www.genome.jp/kegg-bin/show_pathway?hsa05205/hsa:3236%09red/hsa:355%09red/hsa:2258%09red/hsa:10818%09red
Estrogen signaling pathway	KEGG PATHWAY	hsa04915	2	100	0.425793	0.757082	ADCY5|GABBR1	http://www.genome.jp/kegg-bin/show_pathway?hsa04915/hsa:111%09red/hsa:2550%09red
Melanogenesis	KEGG PATHWAY	hsa04916	2	101	0.430779	0.757082	ADCY5|TCF7	http://www.genome.jp/kegg-bin/show_pathway?hsa04916/hsa:111%09red/hsa:6932%09red
Tyrosine metabolism	KEGG PATHWAY	hsa00350	1	39	0.434061	0.757082	TAT	http://www.genome.jp/kegg-bin/show_pathway?hsa00350/hsa:6898%09red
Nicotine addiction	KEGG PATHWAY	hsa05033	1	40	0.442286	0.762427	GABRB3	http://www.genome.jp/kegg-bin/show_pathway?hsa05033/hsa:2562%09red
Alzheimer's disease	KEGG PATHWAY	hsa05010	3	170	0.447291	0.762427	FAS|RYR3|CACNA1F	http://www.genome.jp/kegg-bin/show_pathway?hsa05010/hsa:6263%09red/hsa:355%09red/hsa:778%09red
HIF-1 signaling pathway	KEGG PATHWAY	hsa04066	2	106	0.455366	0.76747	CYBB|FLT1	http://www.genome.jp/kegg-bin/show_pathway?hsa04066/hsa:2321%09red/hsa:1536%09red
Proteasome	KEGG PATHWAY	hsa03050	1	44	0.474022	0.782447	PSME4	http://www.genome.jp/kegg-bin/show_pathway?hsa03050/hsa:23198%09red
Herpes simplex infection	KEGG PATHWAY	hsa05168	3	185	0.503281	0.782447	FAS|HLA-DMB|HLA-F	http://www.genome.jp/kegg-bin/show_pathway?hsa05168/hsa:3134%09red/hsa:355%09red/hsa:3109%09red
Endocrine and other factor-regulated calcium reabsorption	KEGG PATHWAY	hsa04961	1	48	0.50397	0.782447	KLK1	http://www.genome.jp/kegg-bin/show_pathway?hsa04961/hsa:3816%09red
Type II diabetes mellitus	KEGG PATHWAY	hsa04930	1	48	0.50397	0.782447	CACNA1G	http://www.genome.jp/kegg-bin/show_pathway?hsa04930/hsa:8913%09red
Malaria	KEGG PATHWAY	hsa05144	1	49	0.511189	0.782447	COMP	http://www.genome.jp/kegg-bin/show_pathway?hsa05144/hsa:1311%09red
Toxoplasmosis	KEGG PATHWAY	hsa05145	2	119	0.516361	0.782447	LAMA2|HLA-DMB	http://www.genome.jp/kegg-bin/show_pathway?hsa05145/hsa:3908%09red/hsa:3109%09red
Cocaine addiction	KEGG PATHWAY	hsa05030	1	50	0.518305	0.782447	ADCY5	http://www.genome.jp/kegg-bin/show_pathway?hsa05030/hsa:111%09red
Hedgehog signaling pathway	KEGG PATHWAY	hsa04340	1	51	0.525317	0.782447	PTCH2	http://www.genome.jp/kegg-bin/show_pathway?hsa04340/hsa:8643%09red
Mineral absorption	KEGG PATHWAY	hsa04978	1	51	0.525317	0.782447	ATP7A	http://www.genome.jp/kegg-bin/show_pathway?hsa04978/hsa:538%09red
Ovarian steroidogenesis	KEGG PATHWAY	hsa04913	1	51	0.525317	0.782447	ADCY5	http://www.genome.jp/kegg-bin/show_pathway?hsa04913/hsa:111%09red
Vascular smooth muscle contraction	KEGG PATHWAY	hsa04270	2	121	0.525345	0.782447	ADCY5|CACNA1F	http://www.genome.jp/kegg-bin/show_pathway?hsa04270/hsa:111%09red/hsa:778%09red
Endometrial cancer	KEGG PATHWAY	hsa05213	1	52	0.532229	0.782447	TCF7	http://www.genome.jp/kegg-bin/show_pathway?hsa05213/hsa:6932%09red
Pathogenic Escherichia coli infection	KEGG PATHWAY	hsa05130	1	55	0.552373	0.782447	OCLN	http://www.genome.jp/kegg-bin/show_pathway?hsa05130/hsa:100506658%09red
Legionellosis	KEGG PATHWAY	hsa05134	1	55	0.552373	0.782447	NAIP	http://www.genome.jp/kegg-bin/show_pathway?hsa05134/hsa:4671%09red
Staphylococcus aureus infection	KEGG PATHWAY	hsa05150	1	56	0.558895	0.782447	HLA-DMB	http://www.genome.jp/kegg-bin/show_pathway?hsa05150/hsa:3109%09red
Starch and sucrose metabolism	KEGG PATHWAY	hsa00500	1	56	0.558895	0.782447	AMY2B	http://www.genome.jp/kegg-bin/show_pathway?hsa00500/hsa:280%09red
Acute myeloid leukemia	KEGG PATHWAY	hsa05221	1	57	0.565322	0.782447	TCF7	http://www.genome.jp/kegg-bin/show_pathway?hsa05221/hsa:6932%09red
Arginine and proline metabolism	KEGG PATHWAY	hsa00330	1	57	0.565322	0.782447	PRODH	http://www.genome.jp/kegg-bin/show_pathway?hsa00330/hsa:5625%09red
NOD-like receptor signaling pathway	KEGG PATHWAY	hsa04621	1	57	0.565322	0.782447	NAIP	http://www.genome.jp/kegg-bin/show_pathway?hsa04621/hsa:4671%09red
Dopaminergic synapse	KEGG PATHWAY	hsa04728	2	131	0.568578	0.782447	ADCY5|GNG2	http://www.genome.jp/kegg-bin/show_pathway?hsa04728/hsa:111%09red/hsa:54331%09red
Hepatitis C	KEGG PATHWAY	hsa05160	2	133	0.576882	0.783577	OCLN|PPARA	http://www.genome.jp/kegg-bin/show_pathway?hsa05160/hsa:5465%09red/hsa:100506658%09red
Long-term depression	KEGG PATHWAY	hsa04730	1	60	0.584055	0.783577	PRKG2	http://www.genome.jp/kegg-bin/show_pathway?hsa04730/hsa:5593%09red
Systemic lupus erythematosus	KEGG PATHWAY	hsa05322	2	135	0.585071	0.783577	ACTN2|HLA-DMB	http://www.genome.jp/kegg-bin/show_pathway?hsa05322/hsa:88%09red/hsa:3109%09red
Colorectal cancer	KEGG PATHWAY	hsa05210	1	62	0.596097	0.791279	TCF7	http://www.genome.jp/kegg-bin/show_pathway?hsa05210/hsa:6932%09red
Wnt signaling pathway	KEGG PATHWAY	hsa04310	2	141	0.608943	0.800507	TCF7|PRICKLE2	http://www.genome.jp/kegg-bin/show_pathway?hsa04310/hsa:6932%09red/hsa:166336%09red
Pancreatic cancer	KEGG PATHWAY	hsa05212	1	66	0.619155	0.800507	ARHGEF6	http://www.genome.jp/kegg-bin/show_pathway?hsa05212/hsa:9459%09red
Inflammatory bowel disease (IBD)	KEGG PATHWAY	hsa05321	1	66	0.619155	0.800507	HLA-DMB	http://www.genome.jp/kegg-bin/show_pathway?hsa05321/hsa:3109%09red
Complement and coagulation cascades	KEGG PATHWAY	hsa04610	1	69	0.63559	0.800507	FGA	http://www.genome.jp/kegg-bin/show_pathway?hsa04610/hsa:2243%09red
Amphetamine addiction	KEGG PATHWAY	hsa05031	1	70	0.640911	0.800507	ADCY5	http://www.genome.jp/kegg-bin/show_pathway?hsa05031/hsa:111%09red
Fc epsilon RI signaling pathway	KEGG PATHWAY	hsa04664	1	70	0.640911	0.800507	VAV3	http://www.genome.jp/kegg-bin/show_pathway?hsa04664/hsa:10451%09red
Melanoma	KEGG PATHWAY	hsa05218	1	71	0.646154	0.800507	FGF13	http://www.genome.jp/kegg-bin/show_pathway?hsa05218/hsa:2258%09red
RNA degradation	KEGG PATHWAY	hsa03018	1	72	0.651322	0.800507	PABPC1L	http://www.genome.jp/kegg-bin/show_pathway?hsa03018/hsa:80336%09red
Biosynthesis of amino acids	KEGG PATHWAY	hsa01230	1	72	0.651322	0.800507	TAT	http://www.genome.jp/kegg-bin/show_pathway?hsa01230/hsa:6898%09red
Leishmaniasis	KEGG PATHWAY	hsa05140	1	73	0.656416	0.800507	HLA-DMB	http://www.genome.jp/kegg-bin/show_pathway?hsa05140/hsa:3109%09red
Progesterone-mediated oocyte maturation	KEGG PATHWAY	hsa04914	1	86	0.716296	0.836201	ADCY5	http://www.genome.jp/kegg-bin/show_pathway?hsa04914/hsa:111%09red
Salmonella infection	KEGG PATHWAY	hsa05132	1	87	0.720449	0.836201	MYH14	http://www.genome.jp/kegg-bin/show_pathway?hsa05132/hsa:79784%09red
Apoptosis	KEGG PATHWAY	hsa04210	1	88	0.724542	0.836201	FAS	http://www.genome.jp/kegg-bin/show_pathway?hsa04210/hsa:355%09red
Hematopoietic cell lineage	KEGG PATHWAY	hsa04640	1	88	0.724542	0.836201	CD1D	http://www.genome.jp/kegg-bin/show_pathway?hsa04640/hsa:912%09red
Influenza A	KEGG PATHWAY	hsa05164	2	176	0.72778	0.836201	FAS|HLA-DMB	http://www.genome.jp/kegg-bin/show_pathway?hsa05164/hsa:355%09red/hsa:3109%09red
Fc gamma R-mediated phagocytosis	KEGG PATHWAY	hsa04666	1	91	0.736468	0.836201	VAV3	http://www.genome.jp/kegg-bin/show_pathway?hsa04666/hsa:10451%09red
Alcoholism	KEGG PATHWAY	hsa05034	2	180	0.739237	0.836201	ADCY5|GNG2	http://www.genome.jp/kegg-bin/show_pathway?hsa05034/hsa:111%09red/hsa:54331%09red
mRNA surveillance pathway	KEGG PATHWAY	hsa03015	1	92	0.740329	0.836201	PABPC1L	http://www.genome.jp/kegg-bin/show_pathway?hsa03015/hsa:80336%09red
NF-kappa B signaling pathway	KEGG PATHWAY	hsa04064	1	92	0.740329	0.836201	TNFSF13B	http://www.genome.jp/kegg-bin/show_pathway?hsa04064/hsa:10673%09red
HTLV-I infection	KEGG PATHWAY	hsa05166	3	264	0.741432	0.836201	ADCY5|HLA-DMB|HLA-F	http://www.genome.jp/kegg-bin/show_pathway?hsa05166/hsa:111%09red/hsa:3134%09red/hsa:3109%09red
Chagas disease (American trypanosomiasis)	KEGG PATHWAY	hsa05142	1	105	0.785705	0.876502	FAS	http://www.genome.jp/kegg-bin/show_pathway?hsa05142/hsa:355%09red
T cell receptor signaling pathway	KEGG PATHWAY	hsa04660	1	106	0.788851	0.876502	VAV3	http://www.genome.jp/kegg-bin/show_pathway?hsa04660/hsa:10451%09red
TNF signaling pathway	KEGG PATHWAY	hsa04668	1	110	0.800985	0.876946	FAS	http://www.genome.jp/kegg-bin/show_pathway?hsa04668/hsa:355%09red
Viral carcinogenesis	KEGG PATHWAY	hsa05203	2	207	0.806358	0.876946	ACTN2|HLA-F	http://www.genome.jp/kegg-bin/show_pathway?hsa05203/hsa:88%09red/hsa:3134%09red
Oocyte meiosis	KEGG PATHWAY	hsa04114	1	112	0.806791	0.876946	ADCY5	http://www.genome.jp/kegg-bin/show_pathway?hsa04114/hsa:111%09red
Neurotrophin signaling pathway	KEGG PATHWAY	hsa04722	1	120	0.828383	0.893939	FRS2	http://www.genome.jp/kegg-bin/show_pathway?hsa04722/hsa:10818%09red
Osteoclast differentiation	KEGG PATHWAY	hsa04380	1	134	0.860577	0.915507	CYBB	http://www.genome.jp/kegg-bin/show_pathway?hsa04380/hsa:1536%09red
Measles	KEGG PATHWAY	hsa05162	1	134	0.860577	0.915507	FAS	http://www.genome.jp/kegg-bin/show_pathway?hsa05162/hsa:355%09red
Insulin signaling pathway	KEGG PATHWAY	hsa04910	1	142	0.876208	0.925572	PPARGC1A	http://www.genome.jp/kegg-bin/show_pathway?hsa04910/hsa:10891%09red
Hepatitis B	KEGG PATHWAY	hsa05161	1	147	0.885084	0.92841	FAS	http://www.genome.jp/kegg-bin/show_pathway?hsa05161/hsa:355%09red
RNA transport	KEGG PATHWAY	hsa03013	1	164	0.910805	0.948756	PABPC1L	http://www.genome.jp/kegg-bin/show_pathway?hsa03013/hsa:80336%09red
Tuberculosis	KEGG PATHWAY	hsa05152	1	180	0.929773	0.951297	HLA-DMB	http://www.genome.jp/kegg-bin/show_pathway?hsa05152/hsa:3109%09red
MicroRNAs in cancer	KEGG PATHWAY	hsa05206	2	296	0.932436	0.951297	MDM4|HOXD10	http://www.genome.jp/kegg-bin/show_pathway?hsa05206/hsa:4194%09red/hsa:3236%09red
Huntington's disease	KEGG PATHWAY	hsa05016	1	183	0.932856	0.951297	PPARGC1A	http://www.genome.jp/kegg-bin/show_pathway?hsa05016/hsa:10891%09red
Metabolic pathways	KEGG PATHWAY	hsa01100	12	1182	0.938613	0.951297	TAT|GALNT16|ABAT|AMY2B|DHRS9|ST8SIA5|AK7|CSAD|PRODH|ACSBG1|ACADSB|GALNT4	http://www.genome.jp/kegg-bin/show_pathway?hsa01100/hsa:29906%09red/hsa:18%09red/hsa:10170%09red/hsa:36%09red/hsa:5625%09red/hsa:6898%09red/hsa:57452%09red/hsa:122481%09red/hsa:23205%09red/hsa:8693%09red/hsa:280%09red/hsa:51380%09red
Epstein-Barr virus infection	KEGG PATHWAY	hsa05169	1	202	0.949498	0.955871	HLA-F	http://www.genome.jp/kegg-bin/show_pathway?hsa05169/hsa:3134%09red
Olfactory transduction	KEGG PATHWAY	hsa04740	2	406	0.9835	0.9835	ADRBK2|PRKG2	http://www.genome.jp/kegg-bin/show_pathway?hsa04740/hsa:157%09red/hsa:5593%09red

## Sheet: Down_KEGG_pathway_iden
#fg	72
#bg	6644
##Statistical test method: hypergeometric test
##FDR correction method: Benjamini and Hochberg
#Term	Database	ID	Input number	Background number	P-Value	Corrected P-Value	Input	Hyperlink
Drug metabolism - cytochrome P450	KEGG PATHWAY	hsa00982	4	74	0.00824352	0.382006	GSTO2|UGT1A6|GSTT2|FMO4	http://www.genome.jp/kegg-bin/show_pathway?hsa00982/hsa:2329%09red/hsa:54578%09red/hsa:119391%09red/hsa:2953%09red
Leukocyte transendothelial migration	KEGG PATHWAY	hsa04670	5	118	0.00881403	0.382006	NCF2|MYL5|ITGAM|CLDN6|MMP9	http://www.genome.jp/kegg-bin/show_pathway?hsa04670/hsa:4688%09red/hsa:4318%09red/hsa:9074%09red/hsa:3684%09red/hsa:4636%09red
Metabolism of xenobiotics by cytochrome P450	KEGG PATHWAY	hsa00980	4	80	0.010795	0.382006	GSTO2|UGT1A6|GSTT2|CBR3	http://www.genome.jp/kegg-bin/show_pathway?hsa00980/hsa:874%09red/hsa:54578%09red/hsa:119391%09red/hsa:2953%09red
Chemical carcinogenesis	KEGG PATHWAY	hsa05204	4	83	0.0122427	0.382006	GSTO2|UGT1A6|CHRNA7|GSTT2	http://www.genome.jp/kegg-bin/show_pathway?hsa05204/hsa:1139%09red/hsa:54578%09red/hsa:119391%09red/hsa:2953%09red
Hematopoietic cell lineage	KEGG PATHWAY	hsa04640	4	88	0.0149221	0.382006	TPO|GP5|CD34|ITGAM	http://www.genome.jp/kegg-bin/show_pathway?hsa04640/hsa:7173%09red/hsa:947%09red/hsa:3684%09red/hsa:2814%09red
Cell adhesion molecules (CAMs)	KEGG PATHWAY	hsa04514	5	143	0.0190136	0.405624	NRCAM|CNTN1|CD34|ITGAM|CLDN6	http://www.genome.jp/kegg-bin/show_pathway?hsa04514/hsa:1272%09red/hsa:947%09red/hsa:9074%09red/hsa:3684%09red/hsa:4897%09red
Jak-STAT signaling pathway	KEGG PATHWAY	hsa04630	5	157	0.0271933	0.497249	CSF2RB|TPO|SOCS1|IL23A|CSH1	http://www.genome.jp/kegg-bin/show_pathway?hsa04630/hsa:7173%09red/hsa:1439%09red/hsa:8651%09red/hsa:51561%09red/hsa:1442%09red
Transcriptional misregulation in cancer	KEGG PATHWAY	hsa05202	5	179	0.0440693	0.639406	PAX5|HIST1H3C|MMP9|ITGAM|CCR7	http://www.genome.jp/kegg-bin/show_pathway?hsa05202/hsa:8352%09red/hsa:4318%09red/hsa:1236%09red/hsa:5079%09red/hsa:3684%09red
Alcoholism	KEGG PATHWAY	hsa05034	5	180	0.0449582	0.639406	HIST1H2AD|HIST1H3C|HIST2H4A|SHC2|HIST1H2AB	http://www.genome.jp/kegg-bin/show_pathway?hsa05034/hsa:8352%09red/hsa:25759%09red/hsa:8370%09red/hsa:8335%09red/hsa:3013%09red
Chemokine signaling pathway	KEGG PATHWAY	hsa04062	5	189	0.0534453	0.676781	CXCL11|CXCL3|ELMO1|SHC2|CCR7	http://www.genome.jp/kegg-bin/show_pathway?hsa04062/hsa:6373%09red/hsa:25759%09red/hsa:1236%09red/hsa:9844%09red/hsa:2921%09red
Systemic lupus erythematosus	KEGG PATHWAY	hsa05322	4	135	0.0581608	0.676781	HIST1H2AD|HIST1H3C|HIST2H4A|HIST1H2AB	http://www.genome.jp/kegg-bin/show_pathway?hsa05322/hsa:8352%09red/hsa:8370%09red/hsa:8335%09red/hsa:3013%09red
Cytokine-cytokine receptor interaction	KEGG PATHWAY	hsa04060	6	266	0.0674608	0.719582	CSF2RB|CXCL3|IL23A|TPO|CCR7|CXCL11	http://www.genome.jp/kegg-bin/show_pathway?hsa04060/hsa:51561%09red/hsa:1236%09red/hsa:2921%09red/hsa:1439%09red/hsa:7173%09red/hsa:6373%09red
Caffeine metabolism	KEGG PATHWAY	hsa00232	1	7	0.0734679	0.723376	XDH	http://www.genome.jp/kegg-bin/show_pathway?hsa00232/hsa:7498%09red
Regulation of actin cytoskeleton	KEGG PATHWAY	hsa04810	5	215	0.0828939	0.748454	FGF7|MYL5|NCKAP1L|ITGAM|CHRM1	http://www.genome.jp/kegg-bin/show_pathway?hsa04810/hsa:3071%09red/hsa:1128%09red/hsa:2252%09red/hsa:3684%09red/hsa:4636%09red
Drug metabolism - other enzymes	KEGG PATHWAY	hsa00983	2	51	0.105232	0.748454	UGT1A6|XDH	http://www.genome.jp/kegg-bin/show_pathway?hsa00983/hsa:54578%09red/hsa:7498%09red
Glutathione metabolism	KEGG PATHWAY	hsa00480	2	51	0.105232	0.748454	GSTO2|GSTT2	http://www.genome.jp/kegg-bin/show_pathway?hsa00480/hsa:119391%09red/hsa:2953%09red
Legionellosis	KEGG PATHWAY	hsa05134	2	55	0.119294	0.748454	CXCL3|ITGAM	http://www.genome.jp/kegg-bin/show_pathway?hsa05134/hsa:3684%09red/hsa:2921%09red
Vascular smooth muscle contraction	KEGG PATHWAY	hsa04270	3	121	0.143108	0.748454	KCNU1|PLA2G4F|ACTG2	http://www.genome.jp/kegg-bin/show_pathway?hsa04270/hsa:255189%09red/hsa:157855%09red/hsa:72%09red
VEGF signaling pathway	KEGG PATHWAY	hsa04370	2	63	0.148673	0.748454	PLA2G4F|SHC2	http://www.genome.jp/kegg-bin/show_pathway?hsa04370/hsa:255189%09red/hsa:25759%09red
Inflammatory bowel disease (IBD)	KEGG PATHWAY	hsa05321	2	66	0.160045	0.748454	RORA|IL23A	http://www.genome.jp/kegg-bin/show_pathway?hsa05321/hsa:51561%09red/hsa:6095%09red
Arachidonic acid metabolism	KEGG PATHWAY	hsa00590	2	68	0.167714	0.748454	PLA2G4F|CBR3	http://www.genome.jp/kegg-bin/show_pathway?hsa00590/hsa:255189%09red/hsa:874%09red
2-Oxocarboxylic acid metabolism	KEGG PATHWAY	hsa01210	1	17	0.169275	0.748454	NAGS	http://www.genome.jp/kegg-bin/show_pathway?hsa01210/hsa:162417%09red
Primary bile acid biosynthesis	KEGG PATHWAY	hsa00120	1	17	0.169275	0.748454	ACOX2	http://www.genome.jp/kegg-bin/show_pathway?hsa00120/hsa:8309%09red
Neuroactive ligand-receptor interaction	KEGG PATHWAY	hsa04080	5	275	0.176774	0.748454	HTR7|CHRNA7|OPRL1|CHRM1|CSH1	http://www.genome.jp/kegg-bin/show_pathway?hsa04080/hsa:4987%09red/hsa:1128%09red/hsa:1139%09red/hsa:3363%09red/hsa:1442%09red
Osteoclast differentiation	KEGG PATHWAY	hsa04380	3	134	0.17707	0.748454	NCF2|LILRB3|SOCS1	http://www.genome.jp/kegg-bin/show_pathway?hsa04380/hsa:4688%09red/hsa:8651%09red/hsa:11025%09red
PPAR signaling pathway	KEGG PATHWAY	hsa03320	2	71	0.179336	0.748454	ACOX2|ANGPTL4	http://www.genome.jp/kegg-bin/show_pathway?hsa03320/hsa:8309%09red/hsa:51129%09red
Prolactin signaling pathway	KEGG PATHWAY	hsa04917	2	72	0.183237	0.748454	SOCS1|SHC2	http://www.genome.jp/kegg-bin/show_pathway?hsa04917/hsa:8651%09red/hsa:25759%09red
Focal adhesion	KEGG PATHWAY	hsa04510	4	207	0.185917	0.748454	COL5A3|FLNB|MYL5|SHC2	http://www.genome.jp/kegg-bin/show_pathway?hsa04510/hsa:25759%09red/hsa:2317%09red/hsa:50509%09red/hsa:4636%09red
Leishmaniasis	KEGG PATHWAY	hsa05140	2	73	0.187152	0.748454	NCF2|ITGAM	http://www.genome.jp/kegg-bin/show_pathway?hsa05140/hsa:4688%09red/hsa:3684%09red
Pertussis	KEGG PATHWAY	hsa05133	2	75	0.195017	0.748454	ITGAM|IL23A	http://www.genome.jp/kegg-bin/show_pathway?hsa05133/hsa:51561%09red/hsa:3684%09red
Bacterial invasion of epithelial cells	KEGG PATHWAY	hsa05100	2	76	0.198966	0.748454	ELMO1|SHC2	http://www.genome.jp/kegg-bin/show_pathway?hsa05100/hsa:25759%09red/hsa:9844%09red
Peroxisome	KEGG PATHWAY	hsa04146	2	81	0.218847	0.748454	ACOX2|XDH	http://www.genome.jp/kegg-bin/show_pathway?hsa04146/hsa:8309%09red/hsa:7498%09red
Proteoglycans in cancer	KEGG PATHWAY	hsa05205	4	225	0.226538	0.748454	FGF7|FLNB|WNT11|MMP9	http://www.genome.jp/kegg-bin/show_pathway?hsa05205/hsa:4318%09red/hsa:2317%09red/hsa:7481%09red/hsa:2252%09red
Phagosome	KEGG PATHWAY	hsa04145	3	154	0.233029	0.748454	NCF2|ITGAM|ATP6V1B1	http://www.genome.jp/kegg-bin/show_pathway?hsa04145/hsa:4688%09red/hsa:525%09red/hsa:3684%09red
alpha-Linolenic acid metabolism	KEGG PATHWAY	hsa00592	1	25	0.238828	0.748454	PLA2G4F	http://www.genome.jp/kegg-bin/show_pathway?hsa00592/hsa:255189%09red
Insulin secretion	KEGG PATHWAY	hsa04911	2	87	0.242922	0.748454	KCNU1|PCLO	http://www.genome.jp/kegg-bin/show_pathway?hsa04911/hsa:157855%09red/hsa:27445%09red
ECM-receptor interaction	KEGG PATHWAY	hsa04512	2	87	0.242922	0.748454	COL5A3|GP5	http://www.genome.jp/kegg-bin/show_pathway?hsa04512/hsa:2814%09red/hsa:50509%09red
Salmonella infection	KEGG PATHWAY	hsa05132	2	87	0.242922	0.748454	CXCL3|FLNB	http://www.genome.jp/kegg-bin/show_pathway?hsa05132/hsa:2317%09red/hsa:2921%09red
Rheumatoid arthritis	KEGG PATHWAY	hsa05323	2	90	0.255012	0.748454	ATP6V1B1|IL23A	http://www.genome.jp/kegg-bin/show_pathway?hsa05323/hsa:51561%09red/hsa:525%09red
Ascorbate and aldarate metabolism	KEGG PATHWAY	hsa00053	1	27	0.255299	0.748454	UGT1A6	http://www.genome.jp/kegg-bin/show_pathway?hsa00053/hsa:54578%09red
Nitrogen metabolism	KEGG PATHWAY	hsa00910	1	27	0.255299	0.748454	CA14	http://www.genome.jp/kegg-bin/show_pathway?hsa00910/hsa:23632%09red
Collecting duct acid secretion	KEGG PATHWAY	hsa04966	1	27	0.255299	0.748454	ATP6V1B1	http://www.genome.jp/kegg-bin/show_pathway?hsa04966/hsa:525%09red
Glycerophospholipid metabolism	KEGG PATHWAY	hsa00564	2	91	0.259047	0.748454	CDS1|PLA2G4F	http://www.genome.jp/kegg-bin/show_pathway?hsa00564/hsa:255189%09red/hsa:1040%09red
Nicotinate and nicotinamide metabolism	KEGG PATHWAY	hsa00760	1	28	0.263402	0.748454	NMRK1	http://www.genome.jp/kegg-bin/show_pathway?hsa00760/hsa:54981%09red
Phototransduction	KEGG PATHWAY	hsa04744	1	29	0.271418	0.748454	PDE6G	http://www.genome.jp/kegg-bin/show_pathway?hsa04744/hsa:5148%09red
Circadian rhythm	KEGG PATHWAY	hsa04710	1	31	0.287193	0.748454	RORA	http://www.genome.jp/kegg-bin/show_pathway?hsa04710/hsa:6095%09red
Estrogen signaling pathway	KEGG PATHWAY	hsa04915	2	100	0.295355	0.748454	SHC2|MMP9	http://www.genome.jp/kegg-bin/show_pathway?hsa04915/hsa:4318%09red/hsa:25759%09red
Linoleic acid metabolism	KEGG PATHWAY	hsa00591	1	33	0.302631	0.748454	PLA2G4F	http://www.genome.jp/kegg-bin/show_pathway?hsa00591/hsa:255189%09red
Pentose and glucuronate interconversions	KEGG PATHWAY	hsa00040	1	34	0.310226	0.748454	UGT1A6	http://www.genome.jp/kegg-bin/show_pathway?hsa00040/hsa:54578%09red
Calcium signaling pathway	KEGG PATHWAY	hsa04020	3	183	0.31861	0.748454	HTR7|CHRNA7|CHRM1	http://www.genome.jp/kegg-bin/show_pathway?hsa04020/hsa:1128%09red/hsa:1139%09red/hsa:3363%09red
Amoebiasis	KEGG PATHWAY	hsa05146	2	109	0.331438	0.748454	COL5A3|ITGAM	http://www.genome.jp/kegg-bin/show_pathway?hsa05146/hsa:3684%09red/hsa:50509%09red
Glycine, serine and threonine metabolism	KEGG PATHWAY	hsa00260	1	37	0.332525	0.748454	GLDC	http://www.genome.jp/kegg-bin/show_pathway?hsa00260/hsa:2731%09red
TNF signaling pathway	KEGG PATHWAY	hsa04668	2	110	0.335421	0.748454	CXCL3|MMP9	http://www.genome.jp/kegg-bin/show_pathway?hsa04668/hsa:4318%09red/hsa:2921%09red
Bladder cancer	KEGG PATHWAY	hsa05219	1	38	0.339799	0.748454	MMP9	http://www.genome.jp/kegg-bin/show_pathway?hsa05219/hsa:4318%09red
Tyrosine metabolism	KEGG PATHWAY	hsa00350	1	39	0.346995	0.748454	TPO	http://www.genome.jp/kegg-bin/show_pathway?hsa00350/hsa:7173%09red
Cholinergic synapse	KEGG PATHWAY	hsa04725	2	113	0.34733	0.748454	CHRNA7|CHRM1	http://www.genome.jp/kegg-bin/show_pathway?hsa04725/hsa:1128%09red/hsa:1139%09red
Serotonergic synapse	KEGG PATHWAY	hsa04726	2	114	0.351285	0.748454	HTR7|PLA2G4F	http://www.genome.jp/kegg-bin/show_pathway?hsa04726/hsa:255189%09red/hsa:3363%09red
Nicotine addiction	KEGG PATHWAY	hsa05033	1	40	0.354113	0.748454	CHRNA7	http://www.genome.jp/kegg-bin/show_pathway?hsa05033/hsa:1139%09red
Glutamatergic synapse	KEGG PATHWAY	hsa04724	2	118	0.367024	0.748454	PLA2G4F|SHANK1	http://www.genome.jp/kegg-bin/show_pathway?hsa04724/hsa:255189%09red/hsa:50944%09red
Ether lipid metabolism	KEGG PATHWAY	hsa00565	1	42	0.368121	0.748454	PLA2G4F	http://www.genome.jp/kegg-bin/show_pathway?hsa00565/hsa:255189%09red
Toxoplasmosis	KEGG PATHWAY	hsa05145	2	119	0.370938	0.748454	SOCS1|IRGM	http://www.genome.jp/kegg-bin/show_pathway?hsa05145/hsa:8651%09red/hsa:345611%09red
Porphyrin and chlorophyll metabolism	KEGG PATHWAY	hsa00860	1	43	0.375012	0.748454	UGT1A6	http://www.genome.jp/kegg-bin/show_pathway?hsa00860/hsa:54578%09red
Notch signaling pathway	KEGG PATHWAY	hsa04330	1	48	0.408372	0.748454	DLL4	http://www.genome.jp/kegg-bin/show_pathway?hsa04330/hsa:54567%09red
Type II diabetes mellitus	KEGG PATHWAY	hsa04930	1	48	0.408372	0.748454	SOCS1	http://www.genome.jp/kegg-bin/show_pathway?hsa04930/hsa:8651%09red
N-Glycan biosynthesis	KEGG PATHWAY	hsa00510	1	49	0.41483	0.748454	MGAT4C	http://www.genome.jp/kegg-bin/show_pathway?hsa00510/hsa:25834%09red
Hedgehog signaling pathway	KEGG PATHWAY	hsa04340	1	51	0.427538	0.748454	WNT11	http://www.genome.jp/kegg-bin/show_pathway?hsa04340/hsa:7481%09red
Ovarian steroidogenesis	KEGG PATHWAY	hsa04913	1	51	0.427538	0.748454	PLA2G4F	http://www.genome.jp/kegg-bin/show_pathway?hsa04913/hsa:255189%09red
Tight junction	KEGG PATHWAY	hsa04530	2	134	0.428402	0.748454	MYL5|CLDN6	http://www.genome.jp/kegg-bin/show_pathway?hsa04530/hsa:9074%09red/hsa:4636%09red
Natural killer cell mediated cytotoxicity	KEGG PATHWAY	hsa04650	2	137	0.43958	0.748454	SH2D1A|SHC2	http://www.genome.jp/kegg-bin/show_pathway?hsa04650/hsa:25759%09red/hsa:4068%09red
Taste transduction	KEGG PATHWAY	hsa04742	1	53	0.439974	0.748454	TAS2R30	http://www.genome.jp/kegg-bin/show_pathway?hsa04742/hsa:259293%09red
Autoimmune thyroid disease	KEGG PATHWAY	hsa05320	1	53	0.439974	0.748454	TPO	http://www.genome.jp/kegg-bin/show_pathway?hsa05320/hsa:7173%09red
Vibrio cholerae infection	KEGG PATHWAY	hsa05110	1	54	0.446092	0.748454	ATP6V1B1	http://www.genome.jp/kegg-bin/show_pathway?hsa05110/hsa:525%09red
Basal cell carcinoma	KEGG PATHWAY	hsa05217	1	55	0.452143	0.748454	WNT11	http://www.genome.jp/kegg-bin/show_pathway?hsa05217/hsa:7481%09red
Insulin signaling pathway	KEGG PATHWAY	hsa04910	2	142	0.45795	0.748454	SOCS1|SHC2	http://www.genome.jp/kegg-bin/show_pathway?hsa04910/hsa:8651%09red/hsa:25759%09red
Steroid hormone biosynthesis	KEGG PATHWAY	hsa00140	1	56	0.45813	0.748454	UGT1A6	http://www.genome.jp/kegg-bin/show_pathway?hsa00140/hsa:54578%09red
Staphylococcus aureus infection	KEGG PATHWAY	hsa05150	1	56	0.45813	0.748454	ITGAM	http://www.genome.jp/kegg-bin/show_pathway?hsa05150/hsa:3684%09red
Starch and sucrose metabolism	KEGG PATHWAY	hsa00500	1	56	0.45813	0.748454	UGT1A6	http://www.genome.jp/kegg-bin/show_pathway?hsa00500/hsa:54578%09red
Arginine and proline metabolism	KEGG PATHWAY	hsa00330	1	57	0.464052	0.748454	NAGS	http://www.genome.jp/kegg-bin/show_pathway?hsa00330/hsa:162417%09red
NOD-like receptor signaling pathway	KEGG PATHWAY	hsa04621	1	57	0.464052	0.748454	PSTPIP1	http://www.genome.jp/kegg-bin/show_pathway?hsa04621/hsa:9051%09red
Long-term depression	KEGG PATHWAY	hsa04730	1	60	0.481438	0.748454	PLA2G4F	http://www.genome.jp/kegg-bin/show_pathway?hsa04730/hsa:255189%09red
Shigellosis	KEGG PATHWAY	hsa05131	1	61	0.487109	0.748454	ELMO1	http://www.genome.jp/kegg-bin/show_pathway?hsa05131/hsa:9844%09red
Synaptic vesicle cycle	KEGG PATHWAY	hsa04721	1	63	0.498268	0.748454	ATP6V1B1	http://www.genome.jp/kegg-bin/show_pathway?hsa04721/hsa:525%09red
Glioma	KEGG PATHWAY	hsa05214	1	65	0.509187	0.748454	SHC2	http://www.genome.jp/kegg-bin/show_pathway?hsa05214/hsa:25759%09red
PI3K-Akt signaling pathway	KEGG PATHWAY	hsa04151	4	346	0.521095	0.748454	FGF7|COL5A3|CHRM1|CSH1	http://www.genome.jp/kegg-bin/show_pathway?hsa04151/hsa:1128%09red/hsa:1442%09red/hsa:50509%09red/hsa:2252%09red
Retinol metabolism	KEGG PATHWAY	hsa00830	1	68	0.525128	0.748454	UGT1A6	http://www.genome.jp/kegg-bin/show_pathway?hsa00830/hsa:54578%09red
Epithelial cell signaling in Helicobacter pylori infection	KEGG PATHWAY	hsa05120	1	68	0.525128	0.748454	ATP6V1B1	http://www.genome.jp/kegg-bin/show_pathway?hsa05120/hsa:525%09red
Fc epsilon RI signaling pathway	KEGG PATHWAY	hsa04664	1	70	0.53547	0.748454	PLA2G4F	http://www.genome.jp/kegg-bin/show_pathway?hsa04664/hsa:255189%09red
MAPK signaling pathway	KEGG PATHWAY	hsa04010	3	260	0.539628	0.748454	FGF7|FLNB|PLA2G4F	http://www.genome.jp/kegg-bin/show_pathway?hsa04010/hsa:255189%09red/hsa:2317%09red/hsa:2252%09red
Melanoma	KEGG PATHWAY	hsa05218	1	71	0.540558	0.748454	FGF7	http://www.genome.jp/kegg-bin/show_pathway?hsa05218/hsa:2252%09red
Thyroid hormone synthesis	KEGG PATHWAY	hsa04918	1	72	0.545591	0.748454	TPO	http://www.genome.jp/kegg-bin/show_pathway?hsa04918/hsa:7173%09red
Bile secretion	KEGG PATHWAY	hsa04976	1	72	0.545591	0.748454	SLC51B	http://www.genome.jp/kegg-bin/show_pathway?hsa04976/hsa:123264%09red
Biosynthesis of amino acids	KEGG PATHWAY	hsa01230	1	72	0.545591	0.748454	NAGS	http://www.genome.jp/kegg-bin/show_pathway?hsa01230/hsa:162417%09red
Chronic myeloid leukemia	KEGG PATHWAY	hsa05220	1	73	0.550569	0.748454	SHC2	http://www.genome.jp/kegg-bin/show_pathway?hsa05220/hsa:25759%09red
Purine metabolism	KEGG PATHWAY	hsa00230	2	169	0.550898	0.748454	PDE6G|XDH	http://www.genome.jp/kegg-bin/show_pathway?hsa00230/hsa:5148%09red/hsa:7498%09red
B cell receptor signaling pathway	KEGG PATHWAY	hsa04662	1	74	0.555493	0.748454	LILRB3	http://www.genome.jp/kegg-bin/show_pathway?hsa04662/hsa:11025%09red
Tuberculosis	KEGG PATHWAY	hsa05152	2	180	0.585503	0.767471	ITGAM|IL23A	http://www.genome.jp/kegg-bin/show_pathway?hsa05152/hsa:51561%09red/hsa:3684%09red
Phosphatidylinositol signaling system	KEGG PATHWAY	hsa04070	1	81	0.588506	0.767471	CDS1	http://www.genome.jp/kegg-bin/show_pathway?hsa04070/hsa:1040%09red
Apoptosis	KEGG PATHWAY	hsa04210	1	88	0.619099	0.767471	CSF2RB	http://www.genome.jp/kegg-bin/show_pathway?hsa04210/hsa:1439%09red
ErbB signaling pathway	KEGG PATHWAY	hsa04012	1	88	0.619099	0.767471	SHC2	http://www.genome.jp/kegg-bin/show_pathway?hsa04012/hsa:25759%09red
Protein digestion and absorption	KEGG PATHWAY	hsa04974	1	88	0.619099	0.767471	COL5A3	http://www.genome.jp/kegg-bin/show_pathway?hsa04974/hsa:50509%09red
Salivary secretion	KEGG PATHWAY	hsa04970	1	90	0.62742	0.767471	BEST2	http://www.genome.jp/kegg-bin/show_pathway?hsa04970/hsa:54831%09red
GABAergic synapse	KEGG PATHWAY	hsa04727	1	90	0.62742	0.767471	HAP1	http://www.genome.jp/kegg-bin/show_pathway?hsa04727/hsa:9001%09red
MicroRNAs in cancer	KEGG PATHWAY	hsa05206	3	296	0.628781	0.767471	TP63|SOCS1|MMP9	http://www.genome.jp/kegg-bin/show_pathway?hsa05206/hsa:8651%09red/hsa:8626%09red/hsa:4318%09red
Fc gamma R-mediated phagocytosis	KEGG PATHWAY	hsa04666	1	91	0.631513	0.767471	PLA2G4F	http://www.genome.jp/kegg-bin/show_pathway?hsa04666/hsa:255189%09red
Carbon metabolism	KEGG PATHWAY	hsa01200	1	92	0.635562	0.767471	GLDC	http://www.genome.jp/kegg-bin/show_pathway?hsa01200/hsa:2731%09red
GnRH signaling pathway	KEGG PATHWAY	hsa04912	1	92	0.635562	0.767471	PLA2G4F	http://www.genome.jp/kegg-bin/show_pathway?hsa04912/hsa:255189%09red
Metabolic pathways	KEGG PATHWAY	hsa01100	12	1182	0.647047	0.769358	LIPT2|NAGS|ACOX2|CDS1|GLDC|CBR3|XDH|TPO|MGAT4C|ATP6V1B1|UGT1A6|PLA2G4F	http://www.genome.jp/kegg-bin/show_pathway?hsa01100/hsa:1040%09red/hsa:25834%09red/hsa:387787%09red/hsa:874%09red/hsa:255189%09red/hsa:7173%09red/hsa:2731%09red/hsa:8309%09red/hsa:54578%09red/hsa:525%09red/hsa:7498%09red/hsa:162417%09red
Pancreatic secretion	KEGG PATHWAY	hsa04972	1	96	0.651322	0.769358	CLCA2	http://www.genome.jp/kegg-bin/show_pathway?hsa04972/hsa:9635%09red
Circadian entrainment	KEGG PATHWAY	hsa04713	1	97	0.655156	0.769358	RASD1	http://www.genome.jp/kegg-bin/show_pathway?hsa04713/hsa:51655%09red
Melanogenesis	KEGG PATHWAY	hsa04916	1	101	0.670081	0.77973	WNT11	http://www.genome.jp/kegg-bin/show_pathway?hsa04916/hsa:7481%09red
Toll-like receptor signaling pathway	KEGG PATHWAY	hsa04620	1	107	0.691281	0.79511	CXCL11	http://www.genome.jp/kegg-bin/show_pathway?hsa04620/hsa:6373%09red
Pathways in cancer	KEGG PATHWAY	hsa05200	3	327	0.695721	0.79511	FGF7|WNT11|MMP9	http://www.genome.jp/kegg-bin/show_pathway?hsa05200/hsa:4318%09red/hsa:7481%09red/hsa:2252%09red
Neurotrophin signaling pathway	KEGG PATHWAY	hsa04722	1	120	0.732714	0.828463	SHC2	http://www.genome.jp/kegg-bin/show_pathway?hsa04722/hsa:25759%09red
Lysosome	KEGG PATHWAY	hsa04142	1	122	0.738582	0.828463	PSAPL1	http://www.genome.jp/kegg-bin/show_pathway?hsa04142/hsa:768239%09red
Cell cycle	KEGG PATHWAY	hsa04110	1	124	0.744322	0.828463	CDKN2D	http://www.genome.jp/kegg-bin/show_pathway?hsa04110/hsa:1032%09red
Parkinson's disease	KEGG PATHWAY	hsa05012	1	131	0.763452	0.829538	SNCAIP	http://www.genome.jp/kegg-bin/show_pathway?hsa05012/hsa:9627%09red
Hepatitis C	KEGG PATHWAY	hsa05160	1	133	0.768653	0.829538	CLDN6	http://www.genome.jp/kegg-bin/show_pathway?hsa05160/hsa:9074%09red
Oxidative phosphorylation	KEGG PATHWAY	hsa00190	1	133	0.768653	0.829538	ATP6V1B1	http://www.genome.jp/kegg-bin/show_pathway?hsa00190/hsa:525%09red
Measles	KEGG PATHWAY	hsa05162	1	134	0.771212	0.829538	SH2D1A	http://www.genome.jp/kegg-bin/show_pathway?hsa05162/hsa:4068%09red
Ubiquitin mediated proteolysis	KEGG PATHWAY	hsa04120	1	138	0.781169	0.833247	SOCS1	http://www.genome.jp/kegg-bin/show_pathway?hsa04120/hsa:8651%09red
Wnt signaling pathway	KEGG PATHWAY	hsa04310	1	141	0.788355	0.833962	WNT11	http://www.genome.jp/kegg-bin/show_pathway?hsa04310/hsa:7481%09red
Hepatitis B	KEGG PATHWAY	hsa05161	1	147	0.802036	0.841481	MMP9	http://www.genome.jp/kegg-bin/show_pathway?hsa05161/hsa:4318%09red
Hippo signaling pathway	KEGG PATHWAY	hsa04390	1	156	0.820939	0.854311	WNT11	http://www.genome.jp/kegg-bin/show_pathway?hsa04390/hsa:7481%09red
Huntington's disease	KEGG PATHWAY	hsa05016	1	183	0.867602	0.895589	HAP1	http://www.genome.jp/kegg-bin/show_pathway?hsa05016/hsa:9001%09red
Endocytosis	KEGG PATHWAY	hsa04144	1	203	0.894221	0.913141	AGAP2	http://www.genome.jp/kegg-bin/show_pathway?hsa04144/hsa:116986%09red
Viral carcinogenesis	KEGG PATHWAY	hsa05203	1	207	0.898873	0.913141	HIST2H4A	http://www.genome.jp/kegg-bin/show_pathway?hsa05203/hsa:8370%09red
HTLV-I infection	KEGG PATHWAY	hsa05166	1	264	0.946888	0.954344	WNT11	http://www.genome.jp/kegg-bin/show_pathway?hsa05166/hsa:7481%09red
Olfactory transduction	KEGG PATHWAY	hsa04740	1	406	0.989592	0.989592	CLCA2	http://www.genome.jp/kegg-bin/show_pathway?hsa04740/hsa:9635%09red
